# Supplementary material for: Cellulose nanocrystal assisted trace silver nitrate to synthesize green silver nanocomposites with antibacterial activity
Source: Royal Society of Chemistry journal article supplement (doi:10.1039/d0ra07198f), 2021-01-01
Supplement: d0ra07198f1.pdf [file d0ra07198f1.pdf]

## **Cellulose nanocrystal assisted trace silver nitrate to synthesize green silver nanocomposites with antibacterial activity**

Jiang Zhu,<sup>\*a</sup> Tao Tang,<sup>a</sup> Chun-Yan Hu,<sup>a</sup> Wen-Cai Xiang,<sup>a</sup> Zhi-Qiang Chen,<sup>a</sup> Liu Luo,<sup>a</sup> He-Shan Yang<sup>b</sup> and Hong-Pan Liu<sup>b</sup>

<sup>a</sup> Chongqing Key Laboratory of Environmental Materials & Remediation Technologies, Chongqing University of Arts and Sciences, Yongchuan 402160, China.

<sup>b</sup> College of Chemistry and Environmental Engineering, Chongqing University of Arts and Sciences, Yongchuan 402160, China.

**Table S1.** L9 (3<sup>4</sup>) The range analysis of the intensity of UV absorption peak at 420 nm.

| #     | CNC(mg/ml) | Ag+<br>×10 <sup>2</sup> (mM) | Power(w) | Time(s) | UV/vis<br>absorbance at<br>410 nm |
|-------|------------|------------------------------|----------|---------|-----------------------------------|
| T1    | 1.5        | 3.00                         | 320      | 200     | 0.80                              |
| T2    | 1.5        | 1.50                         | 240      | 250     | 0.39                              |
| T3    | 1.5        | 0.75                         | 160      | 300     | 0.28                              |
| T4    | 0.5        | 3.00                         | 240      | 300     | 0.56                              |
| T5    | 0.5        | 1.50                         | 160      | 200     | 0.29                              |
| T6    | 0.5        | 0.75                         | 320      | 250     | 0.24                              |
| T7    | 0          | 3.00                         | 160      | 250     | 0.38                              |
| T8    | 0          | 1.50                         | 320      | 300     | 0.14                              |
| T9    | 0          | 0.75                         | 240      | 200     | 0.10                              |
| K1    | 1.47       | 1.74                         | 1.18     | 1.19    |                                   |
| K2    | 1.09       | 0.82                         | 1.05     | 1.01    |                                   |
| K3    | 0.62       | 0.62                         | 0.95     | 0.98    |                                   |
| k1    | 0.49       | 0.58                         | 0.39     | 0.40    |                                   |
| k2    | 0.36       | 0.27                         | 0.35     | 0.34    |                                   |
| k3    | 0.21       | 0.21                         | 0.32     | 0.33    |                                   |
| Range | 0.28       | 0.37                         | 0.07     | 0.07    |                                   |

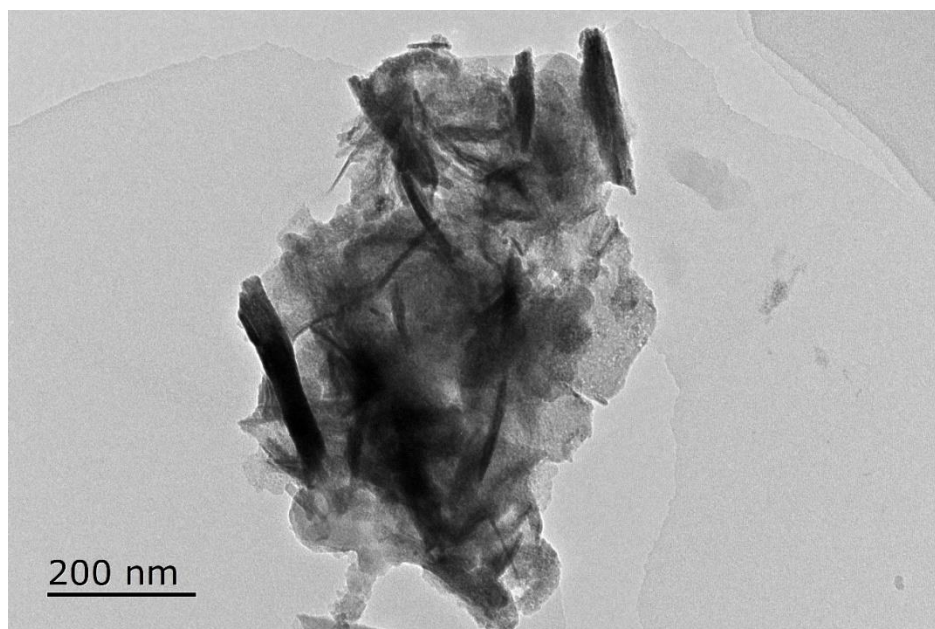

**Figure S1.** TEM image of pure CNC.

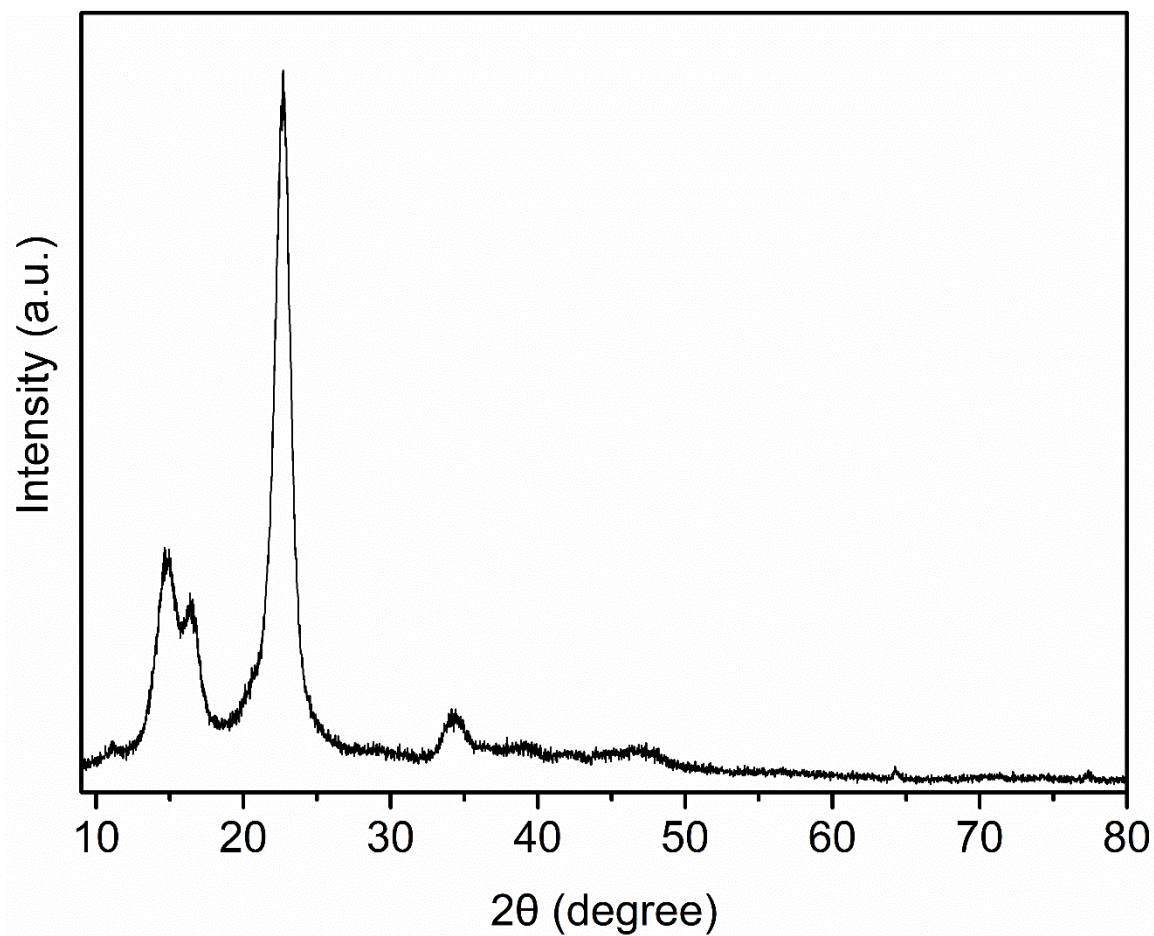

Figure S2. Wide-angle XRD patterns of the pure CNC.

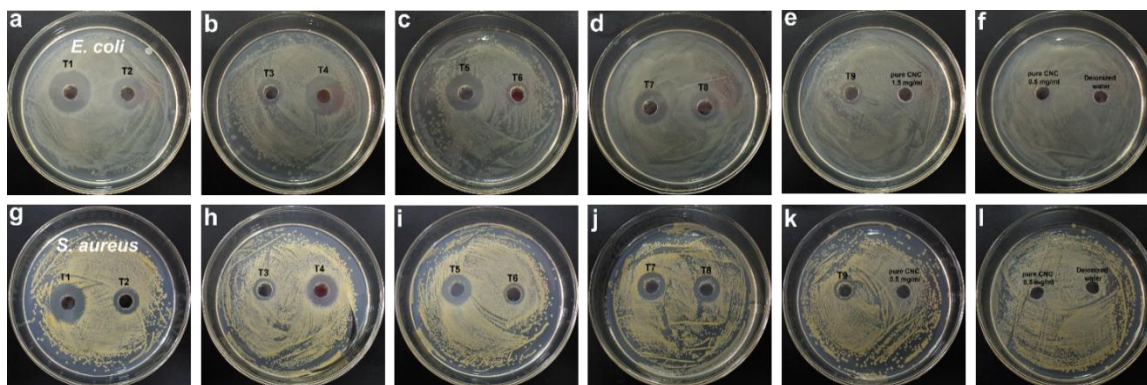

Figure S3. The photos of the antibacterial activity of AgNPs@CNC orthogonal array samples (a-l).
